# Identifying Gender-Preferred Communication Styles within Online Cancer Communities: A Retrospective, Longitudinal Analysis

Kathleen T. Durant<sup>3\*</sup>, Alexa T. McCray<sup>1,2</sup>, Charles Safran<sup>1,2</sup>

**1** Beth Israel Deaconess Medical Center, Boston, Massachusetts, United States of America, **2** Harvard Medical School, Boston, Massachusetts, United States of America, **3** Silverlink Communications, Boston, Massachusetts, United States of America

## Abstract

**Background:** The goal of this research is to determine if different gender-preferred social styles can be observed within the user interactions at an online cancer community. To achieve this goal, we identify and measure variables that pertain to each gender-specific social style.

**Methods and Findings:** We perform social network and statistical analysis on the communication flow of 8,388 members at six different cancer forums over eight years. Kruskal-Wallis tests were conducted to measure the difference between the number of intimate (and highly intimate) dyads, relationship length, and number of communications. We determine that two patients are more likely to form an intimate bond on a gender-specific cancer forum (ovarian  $P < 0.0001$ , breast  $P = 0.0089$ , prostate  $P = 0.0021$ ). Two female patients are more likely to form a highly intimate bond on a female-specific cancer forum (Ovarian  $P < 0.0001$ , Breast  $P < 0.01$ ). Typically a male patient communicates with more members than a female patient (Ovarian forum  $P = 0.0406$ , Breast forum  $P = 0.0013$ ). A relationship between two patients is longer on the gender-specific cancer forums than a connection between two members not identified as patients (ovarian forum  $P = 0.00406$ , breast forum  $P = 0.00013$ , prostate forum  $P = 0.0003$ ).

**Conclusion:** The high level of interconnectedness among the prostate patients supports the hypothesis that men prefer to socialize in large, interconnected, less-intimate groups. A female patient is more likely to form a highly intimate connection with another female patient; this finding is consistent with the hypothesis that women prefer fewer, more intimate connections. The relationships of same-gender cancer patients last longer than other relationships; this finding demonstrates homophily within these online communities. Our findings regarding online communication preferences are in agreement with research findings from person-to-person communication preference studies. These findings should be considered when designing online communities as well as designing and evaluating psychosocial and educational interventions for cancer patients.

**Citation:** Durant KT, McCray AT, Safran C (2012) Identifying Gender-Preferred Communication Styles within Online Cancer Communities: A Retrospective, Longitudinal Analysis. PLoS ONE 7(11): e49169. doi:10.1371/journal.pone.0049169

**Editor:** Richard Fielding, The University of Hong Kong, Hong Kong

**Received:** June 21, 2012; **Accepted:** October 8, 2012; **Published:** November 14, 2012

This is an open-access article, free of all copyright, and may be freely reproduced, distributed, transmitted, modified, built upon, or otherwise used by anyone for any lawful purpose. The work is made available under the Creative Commons CC0 public domain dedication.

**Funding:** This work was partially supported by the National Library of Medicine Grant T15-RFA-LM-06-001. No additional external funding received for this study. Any opinions, findings, and conclusions or recommendations expressed within this material are the authors' and do not necessarily reflect those of the sponsor. The funders had no role in study design, data collection and analysis, decision to publish, or preparation of the manuscript.

**Competing Interests:** Kathleen Durant is currently employed by Silverlink Communications; this employment does not pose a conflict of interest, and it does not alter the authors' adherence to all the PLOS ONE policies on sharing data and materials.

\* E-mail: Kathleen.durant@post.harvard.edu

## Introduction

Early in life and continuing into adulthood, humans like other animals, segregate themselves by gender [1–7]. Within their segregated milieus, females prefer to interact with one or two other individuals at a single time in distinct and separate cliques [8–11]. Whereas males prefer to form one large interconnected group of many individuals; hence displaying a preference to socialize in large coalitions with dominance hierarchies. A smaller social sphere for females, allows females to allocate greater investment into fewer more intimate bonds [12]. These more intimate bonds that females form typically require many exchanges; more exchanges than male bonds [13]. Female to female relationships require more maintenance behavior than male to male relation-

ships; maintenance behaviors such as more interaction, more openness and more supportiveness [14]. Given this required extra maintenance behavior, female relationships have been found to be more fragile than male bonds, requiring more of an investment of the two individuals [15]. A male to male bond has been shown to be more resilient and to last longer [16–18]. These different social styles have been shown to effect the preferred problem solving tasks; males have been found to be more efficient at collaborative problem solving tasks; while women are more efficient at dyadic sharing tasks [12] and avoidance of conflict [15].

Given these different male and female preferred social styles, we investigate if these different social styles can be identified within an online cancer community. We quantify gender-specific social styles by measuring the number of people a typical member commu-

nicates with and the number of shared messages between two members. Our findings show online communication styles of identified male patients typically follow the preferred communication styles associated with males and online communication styles of identified female patients typically follow the preferred communication style of females.

Research has shown that language (the chosen words) as well as discourse constructs used by women is different from language and discourse constructs used by men [19–20] and these differences can be found in face-to-face communication as well as computer-mediated communication. Computer-mediated communication has been analyzed using methodological techniques such as conversation analysis, critical discourse analysis, and language variation. It has been applied to electronic mail lists, Usenet newsgroups, chat room dialogs, and more recently online video sessions [21–25]. Other computer-mediated communication studies have focused on health communities [26–28]. These previous studies analyzed the communication content of a mixed-gender online health community; we consider the communication patterns between male-to-male and female-to-female online cancer forum members. Our communication pattern results dovetail with the prior communication content analysis studies; gender-specific communications patterns found within online communication patterns are similar to face-to-face communication patterns.

Identifying a female-specific and a male-specific communication style practiced by cancer patients within an online cancer forum allows the medical community to understand each gender's preferred method for seeking and discovering information online as well as their method for seeking social support for coping with cancer. Previous research has analyzed social support for cancer patients both online and in person [29–43], our research considers the effect gender-preferred communication and social styles have on the social support cancer patients practice and provide within an online cancer forum. We believe monitoring patients' communication interactions can provide insights into the different psychosocial needs of male and female cancer patients. These insights can be used to refine online social communities as well as gender-specific psychosocial interventions for cancer patients. For example, research on psychotherapy demonstrates that females prefer one-on-one counseling, whereas males prefer group counseling for topics such as substance abuse (Alcoholic Anonymous), post-traumatic stress disorder and sexual abuse [43–50]. This research shows gender-specific social preferences can also be found in online communities and should be considered when designing and evaluating Health 2.0 interventions.

We view communication interactions within an online medical forum as a patient-chosen psychosocial intervention. Patients are seeking medical advice, social support, and survival tactics from people online who have experience with the same disease. It is an activity that patients as well as caregivers are practicing to help cope with cancer. This practice has not necessarily been recommended by a health care professional, yet 18% of the US Internet users have turned to the Internet to find similar patients with the same medical condition [51]. Clinical research has reported benefits from discussing health issues with other people. For example, one study has shown that cancer patients who join in-person discussion groups experience a significantly improved quality of life, a significantly reduced pain level [33] as well as a decrease in the three most significant stressors for cancer patients: unwanted aloneness, loss of hope and loss of control [34]. One study reports a decrease in depression and reaction to pain for online support group members [31,35].

Online cancer forums provide an opportunity to become part of a community where the common factor among the members is the battle against cancer. It also provides a method for cancer patients to offer peer support. Peer support allows people with similar experiences to offer each other practical advice and suggestions for strategies that professionals may not offer [52]. Online forums provide a benefit to patients seeking information (thread creators) through the information they receive. They also provide a benefit to patients providing information (thread responders) since these patients receive a sense of accomplishment by providing coping methods and knowledge on cancer that is beneficial to other cancer patients [52]. Peer social networks have been shown to improve the quality of life of participants [53–55].

## Materials and Methods

### Ethics Statement

Ethical approval: This work was approved by the Beth Israel Deaconess Medical Center Institutional.

Review Board. Since the research involved publicly available comments from the Internet, the board decided consent from the members providing the comments was not needed.

### Participants

Www.cancercompass.com is an active cancer forum for individuals interested in discussing issues associated with 33 different types of cancer as well as forums on nutrition, care giving, treatment and prevention of cancer. Cancercompass.com was created in 2001 by the Cancer Treatment Centers of America™. We examine the communication patterns between 8,388 members on six different cancer-specific forums consisting of 27,450 unique communication messages. We harvest the posts, threads and users' data for the six cancer forums from cancercompass.com using html parsers. The collection was created on May 17, 2010; the time span of the thread corpus is from September 1, 2001 to April 30, 2010. We discarded threads created between April 30, 2010 and May 17, 2010 but allowed response posts to previously created threads to be included within the study. This allowed each forum at least 17 days to respond to an existing thread.

Table 1 describes the metadata associated with six different cancer forums found on the website: melanoma, renal cell carcinoma, breast cancer, ovarian cancer, testicular cancer and prostate cancer. The table describes the number of users and the user types found at each forum; the number of threads authored and the number of posts written by each of the different user types. We describe the collected data below.

A member is a user or a person within the discussion forum; a user may be one of several different user types: *caregiver*, *patient*, *survivor*, *doctor*, *nurse*, *student*, *researcher* and *unknown*. Members self-assign a user type when they register at the cancercompass website. A user type typically describes the relationship the user has with cancer. Since user type is the only data collected that describes the member, we use this data as well as the cancer type to deduce the gender of ovarian cancer and breast cancer patients as females and testicular and prostate patients as males. Within our statistical analysis, we group members who register as caregivers, doctors, students, researchers, nurses and unknown as members of the *non-patient* group and members who register as survivors and patients as the *patient/survivor group*. We use these categorical variables as factors within our statistical analysis.

A thread is created when one member poses a discussion topic and other members post text relating to the topic. A member who poses a discussion to the forum is the creator or the author of a

**Table 1.** User type, thread and post count for the participating forums.

| <b>User Type chosen by Members at Registration</b> |                          |                 |                     |               |              |                |                   |                |              |
|----------------------------------------------------|--------------------------|-----------------|---------------------|---------------|--------------|----------------|-------------------|----------------|--------------|
| <b>User Type</b>                                   | <b>Patient</b>           | <b>Survivor</b> | <b>Care giver</b>   | <b>Doctor</b> | <b>Nurse</b> | <b>Student</b> | <b>Researcher</b> | <b>Unknown</b> | <b>Total</b> |
| <b>Member Groups</b>                               |                          |                 |                     |               |              |                |                   |                |              |
|                                                    | <b>Patient/Survivors</b> |                 | <b>Non-patients</b> |               |              |                |                   |                |              |
| <b>Forums</b>                                      |                          |                 |                     |               |              |                |                   |                |              |
| Melanoma                                           | 351                      | 54              | 155                 | 8             | 1            | 0              | 29                | 367            | 965          |
| Renal-cell                                         | 327                      | 21              | 232                 | 6             | 2            | 0              | 7                 | 308            | 903          |
| Prostate                                           | 609                      | 81              | 231                 | 31            | 0            | 0              | 47                | 378            | 1377         |
| Testicular                                         | 21                       | 8               | 15                  | 3             | 0            | 0              | 11                | 39             | 97           |
| Ovarian                                            | 554                      | 129             | 99                  | 15            | 0            | 1              | 31                | 518            | 1347         |
| Breast                                             | 1453                     | 587             | 161                 | 36            | 1            | 1              | 67                | 976            | 3282         |
| <b>Total</b>                                       |                          |                 |                     |               |              |                |                   |                | 8388         |
| <b>Threads</b>                                     |                          |                 |                     |               |              |                |                   |                |              |
| Melanoma                                           | 205                      | 22              | 81                  | 3             | 1            | 0              | 17                | 273            | 602          |
| Renal-cell                                         | 216                      | 8               | 195                 | 2             | 1            | 0              | 3                 | 248            | 673          |
| Prostate                                           | 565                      | 38              | 194                 | 4             | 0            | 0              | 39                | 343            | 1183         |
| Testicular                                         | 13                       | 2               | 10                  | 00            | 0            | 0              | 11                | 31             | 67           |
| Ovarian                                            | 350                      | 42              | 62                  | 3             | 0            | 1              | 27                | 376            | 861          |
| Breast                                             | 956                      | 309             | 69                  | 8             | 0            | 0              | 37                | 620            | 1999         |
| <b>Total</b>                                       |                          |                 |                     |               |              |                |                   |                | 5385         |
| <b>Posts</b>                                       |                          |                 |                     |               |              |                |                   |                |              |
| Melanoma                                           | 1003                     | 117             | 452                 | 122           | 5            | 0              | 39                | 986            | 2724         |
| Renal-cell                                         | 1323                     | 138             | 1145                | 20            | 6            | 0              | 12                | 923            | 3567         |
| Prostate                                           | 3346                     | 790             | 657                 | 411           | 0            | 0              | 121               | 1146           | 6471         |
| Testicular                                         | 37                       | 10              | 21                  | 6             | 0            | 0              | 13                | 58             | 145          |
| Ovarian                                            | 2919                     | 386             | 333                 | 42            | 0            | 1              | 70                | 1173           | 4924         |
| Breast                                             | 4841                     | 2158            | 301                 | 241           | 2            | 1              | 113               | 1962           | 9619         |
| <b>Total</b>                                       |                          |                 |                     |               |              |                |                   |                | 27450        |

doi:10.1371/journal.pone.0049169.t001

thread. A thread is a discussion that is open and may be joined by any existing member. Both the number of threads and the number of posts are listed in Table 1.

There is a large variation between the sizes of the six forums in all three measures (number of users, threads, posts). This is expected since the prevalence of these cancers varies. Another interesting variation among the forums is the percentages of members who have been diagnosed with cancer that consider themselves a survivor rather than as a patient. The percentages of survivors of the members who have been diagnosed with cancer are: melanoma forum 13.3%, renal cell cancer forum 6.0%, prostate cancer forum 11.7%, ovarian cancer forum 18.9%, and breast cancer forum 28.8%. The patients on the female-specific cancer forums are more likely to identify with the label *survivor* when compared to the other forums. Given the limited communication on the testicular forum (145 posts in eight years), we eliminate it from the statistical analysis.

### Factors Affecting Analysis

Since we are investigating gender specific behaviors, in Table 2 we present Surveillance Epidemiology and End Results (SEER) age-adjusted incidence rate (time period for diagnosis 1975–2007) for each studied cancer stratified by gender; the

data was tabulated by the U.S. National Cancer Institute [56–58]. Table 2 shows that males are more than twice as likely to be diagnosed with renal cell cancer as females, whereas the melanoma incidence is more balanced between the two genders. We hypothesize that the difference in gender incidence between these two cancers will affect the communication patterns found at these gender-neutral forums. Given the high percentage of renal cell cancer patients that are male, we expect the communication style of a renal cell cancer patient to more likely follow the behavior of a male cancer patient than a female cancer patient. Given the low number of males diagnosed with breast cancer, we treat the breast cancer forum as a female-specific cancer forum.

### Network Creation

We represent each cancer forum as a social network [59–60] where the nodes represent the members of the forum and the arcs represent the directed communication between two members. A node is added to the network when that member writes his/her first post. A connection or arc between two nodes represents a directed communication channel between two members and constitutes a bond between the members. The relative thickness of an arc represents the number of directed communications between

**Table 2.** Cancer incidence rate per 100,000.

|                  | Breast | Ovarian | Prostate | Testicular | Melanoma | Renal cell |
|------------------|--------|---------|----------|------------|----------|------------|
| Male Incidence   | 1.08   | 0       | 154.25   | 5.04       | 18.83    | 15.21      |
| Female Incidence | 124.68 | 14.75   | 0        | 0          | 13.12    | 7.46       |

doi:10.1371/journal.pone.0049169.t002

the two members and is an indicator of the bond's intimacy. The software network tool Pajek version 2.04 [59] is used to represent the networks; the Kamada-Kawai algorithm [61] is used to visualize the networks.

## Methods

We measure the total number of messages a member composes; this value corresponds to the total contribution this person has made to the forum. It is represented in the network by the total number of output edges as well as the edges' thickness emanating from a node. We also measure the number of members each member has corresponded with (breadth variable). This value is represented in the network by the number of edges connected to a node. These two communication metrics allow us to distinguish members who prefer to communicate with a small group of people from members who prefer to communicate with a relatively larger group of people.

As in previous studies, we represent the level of intimacy between two forum members with the total count of communication interactions between the two members [62–63]. We convert the count of communication interactions to an ordinal variable representing three different relationship levels: *acquaintance*, a *slightly intimate* relationship and a *highly intimate* relationship. The relationship level is a proxy for the level of support the two members are providing to one another; it differentiates the intimate relationships from the casual relationships.

We define the different relationship levels as the following. Two members communicating fewer than the average plus the standard deviation are considered acquaintances. Members communicating more than this threshold are considered intimate. We further separate the intimate connections into slightly intimate and highly intimate connections. An intimate member, communicating more than the average plus two times the standard deviation, is considered highly intimate. A highly intimate relationship identifies two members who prefer to communicate with one another. We measure the likelihood that two patients will have an intimate or highly intimate relationship to determine if patients prefer to communicate online with other patients rather than other online users.

## Statistical Methods

Since the variables we measure are not normally distributed, we use nonparametric tests for statistically significant testing. Also, since we are performing multiple pairwise comparisons, we employ the Bonferroni correction method when performing multiple comparisons. We use the Kruskal-Wallis test for analysis; since the Kruskal-Wallis test returns differences on the ranks of the means, only the direction (positive, negative) of the difference can be used in the interpretation of the results.

## Results

### Statistical Analysis

Table 3 presents a comparison of the communication metrics of the patient/survivor group (members registering as either a patient or a survivor of cancer) within the five forums. Each row in Table 3 performs a pair-wise comparison of the number of patient/survivor connections and the number of messages communicated by patient/survivors on each of the five forums. These two metrics quantify the number of people a patient/survivor communicates with (breadth of a member's connections) and the total number of messages created by a patient/survivor (contribution to the forum). When comparing the number of connections for patient/survivors using forum as a factor, (column 2, *P* column), Table 3 shows patient/survivors in the ovarian and the breast forum (identified female patient/survivors) statistically behave the same (row 5). They also behave similarly, in terms of the number of people communicated with and the total number of created messages, as the melanoma patient/survivors (row 7, row 9).

Table 3 shows that patient/survivors on the prostate forum, in general, choose to communicate with more members than patient/survivors of the breast, ovarian and melanoma forums (row 1, row 2, and row 4 respectively). The number of connections for the renal cell cancer patient/survivors does not statistically differ from the prostate and the ovarian forums (row 3, row 6) but does differ from the melanoma patient/survivor connections and the breast cancer patient/survivor connections (row 8, row 10). Prostate patient/survivors send more messages than breast cancer patient/survivors and melanoma patient/survivors (row 2 and row 4 column 4). Male prostate patient/survivors within the prostate forum send more messages and connect with more people than female patient/survivors do on the breast cancer forum. However, female ovarian patient/survivors send statistically the same number of messages as prostate patient/survivors but these ovarian patient/survivor messages are sent to fewer people.

Table 4 compares the relationship variables of the patient/survivor population to the general population for each of the five forums. It is not comparing measures across forums as the analysis in Tables 3 did. It measures the relationship duration (measured in days), for the intimate and the highly intimate communications between patient/survivor dyads (both members registered as a patient or a survivor) versus other dyads where both members are not patient/survivors (at least one of the members registered as a caregiver, doctor, nurse, student, researcher or other).

Column 1, Table 4 shows that a relationship (between two patient/survivors is more likely to be longer (in days) on the prostate, ovarian, and breast forums (gender-specific cancer forums) than a connection between two members where both are not identified as patient/survivors. Within the renal cell cancer forum there is no significant difference between the relationship duration of two patient/survivors when compared to the duration of a typical connection between two non-patient/survivor members. Melanoma patient/survivors are more likely to have shorter connections (in days) than two members not identified as patient/survivors. This finding shows that same-gendered patient/survivors, once connected, will stay connected longer to each other than to a member who is a non-patient member.

Column 2, Table 4 shows that an intimate connection on the prostate, ovarian, and breast cancer forums is more likely to exist between two patient/survivors than between two members not identified as patient/survivors ( $P=.0021$ ,  $P<.0001$ ,  $P=.0089$  respectively). Within the renal cell forum there is no statistical

**Table 3.** Communication metrics comparison on the six forums.

| Row | Forum comparison        | Number of patient connections |       | Number of patient messages |        |
|-----|-------------------------|-------------------------------|-------|----------------------------|--------|
|     |                         | Difference                    | P     | Difference                 | P      |
| 1.  | Prostate vs. Ovarian    | 175.70                        | .0406 | 172.03                     | 0.0593 |
| 2.  | Prostate vs. Breast     | 191.41                        | .0013 | 195.47                     | 0.0013 |
| 3.  | Prostate vs. Renal cell | 36.48                         | 1.00  | 7.23                       | 1.000  |
| 4.  | Prostate vs. Melanoma   | 276.64                        | .0010 | 292.75                     | 0.0005 |
| 5.  | Ovarian vs. Breast      | 15.70                         | 1.00  | 23.44                      | 1.0000 |
| 6.  | Ovarian vs. Renal cell  | -139.23                       | .6200 | -164.79                    | 0.3071 |
| 7.  | Ovarian vs. Melanoma    | 100.93                        | 1.00  | 120.72                     | .9641  |
| 8.  | Breast vs. Renal cell   | -154.92                       | .1837 | -188.23                    | 0.0507 |
| 9.  | Breast vs. Melanoma     | 85.23                         | 1.00  | 97.28                      | 1.0000 |
| 10. | Renal cell vs. Melanoma | 240.16                        | .0373 | 285.51                     | 0.0075 |

doi:10.1371/journal.pone.0049169.t003

difference between the types of members forming an intimate connection ( $P = .9224$ ). Within the melanoma forum, two patient/survivors are less likely to form an intimate connection than two members who both are not patient/survivors (negative result,  $P = .0206$ ). This finding supports the belief that same gender patient/survivors suffering from the same cancer, will prefer to communicate with another patient/survivor with the same gender (gender homophilic effect).

Since column 3, Table 4 shows that an intimate connection is more likely to exist between two patient/survivor members on a gender-specific forum, we next determine if highly intimate connections are also more likely to exist between two patient/survivors on these gender-specific cancer forums. Column 3, Table 4 shows that an intimate connection is more likely to exist between two patient/survivors on a female-specific cancer forum (breast  $P < .01$ , ovarian  $P < .0001$ ); however a male patient/survivor on the prostate forum is not more likely to form a highly intimate connection with another male patient/survivor ( $P = .1985$ ). This finding shows that female patient/survivors on female-specific cancer forums are more likely to form a highly intimate connection with one another; however male patient/survivors on male-specific forums are not more likely to form a highly intimate connection with another male patient/survivor. This finding supports the belief that female to female relationships require more maintenance behavior than male to male relationships; maintenance behaviors such as more interaction, more openness and more supportiveness [14].

### Social Network Analysis

We apply social network analysis [59–60] to visualize the different social styles within the forums. Within the visualization, we use different node color and shape for the different user types a person may register as at the cancercompass website. However, we use shades of red to represent the patient/survivor group. In Figures 1–5 the representation is the following: red square nodes are patients, pink square nodes are survivors, blue circle nodes are caregivers, light yellow triangle nodes are unknown, and light green triangle nodes are doctors. The relative thickness of an arc represents the number of communication messages between two members; a thicker arc represents more communication. We limit the visualization to intimate relationships, since we are interested in the small sub-network that may feel a social connection to one another. Interestingly, none of the members registered as a nurse, researcher or a student are part of an intimate dyad.

The breast cancer forum (Figure 1) is the largest forum and contains the highest number of intimate connections. Its intimate connections are primarily between two patient/survivors. Within the gender-specific cancer forums (Figures 1–3), a patient/survivor member are more likely to have an intimate connection with another patient/survivor member. This fact is visually displayed by the prominence of red and pink nodes within the gender-specific cancer forums. This finding is not found in the gender-neutral cancer forums. In the gender-neutral cancer forums (Figure 4–5) caregivers are playing an important role in the formation of intimate connections. Unfortunately, we do not have access to the caregivers' genders so we are unable to determine if

**Table 4.** Relationship metric comparisons at the six forums.

|            | Relationship duration<br>Patient vs. nonspecific |         | Intimate connections<br>Patient vs. nonspecific |         | Highly Intimate connections<br>Patient vs. nonspecific |         |
|------------|--------------------------------------------------|---------|-------------------------------------------------|---------|--------------------------------------------------------|---------|
|            | Diff                                             | P value | Diff                                            | P value | Diff                                                   | P value |
| Prostate   | 83.88                                            | 0.0006  | 48.51                                           | 0.0021  | 6.648                                                  | .1985   |
| Ovarian    | 67.28                                            | 0.0008  | 54.43                                           | <0.0001 | 9.5                                                    | <.0001  |
| Breast     | 101.05                                           | 0.0003  | 37.66                                           | 0.0089  | 20.40                                                  | <.01    |
| Melanoma   | -65.15                                           | 0.0022  | -20.01                                          | .0206   | NA                                                     |         |
| Renal cell | -16.29                                           | 0.4869  | 1.2466                                          | .9224   |                                                        |         |

doi:10.1371/journal.pone.0049169.t004



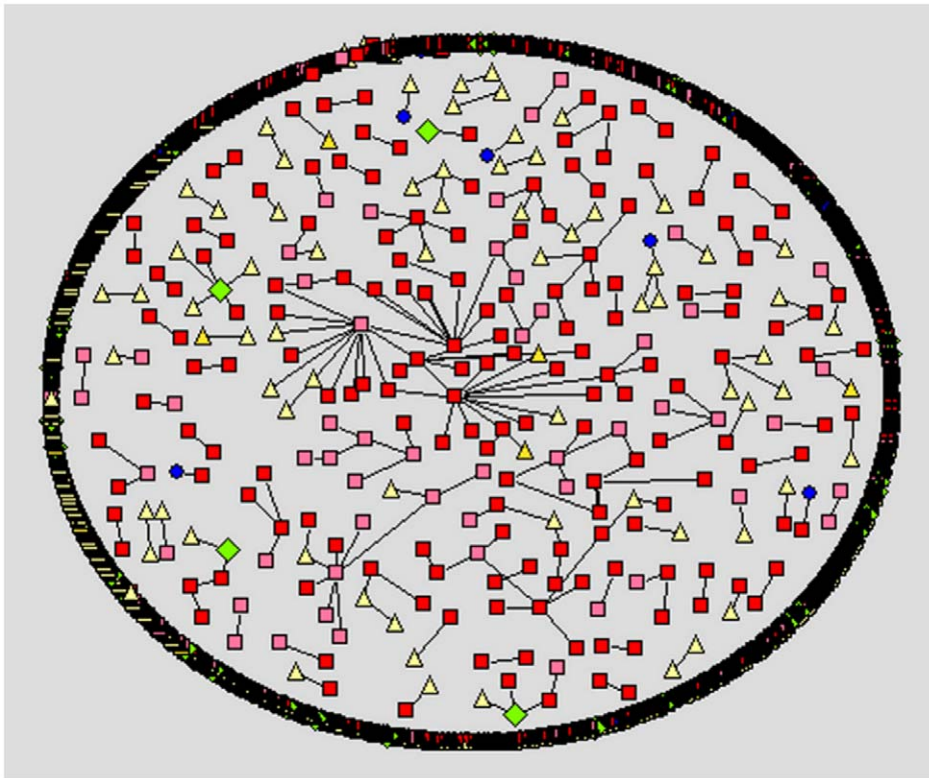

**Figure 1. Breast cancer forum, intimate dyads.**  
doi:10.1371/journal.pone.0049169.g001

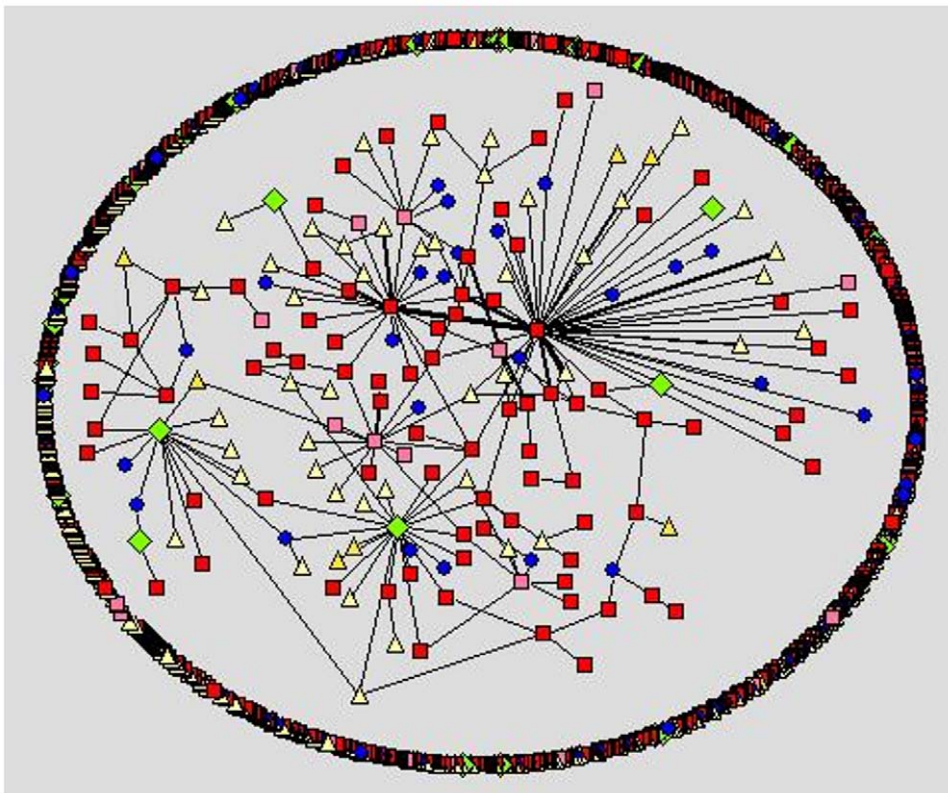

**Figure 2. Prostate cancer forum, intimate dyads.**  
doi:10.1371/journal.pone.0049169.g002

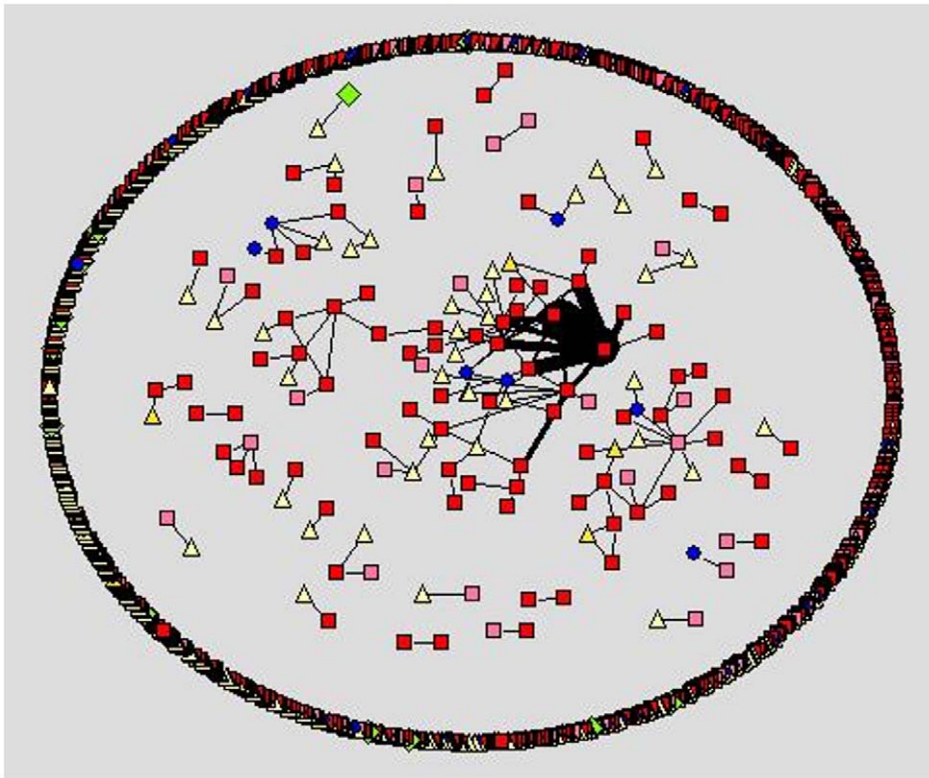

**Figure 3. Ovarian cancer forum, intimate dyads.**  
doi:10.1371/journal.pone.0049169.g003

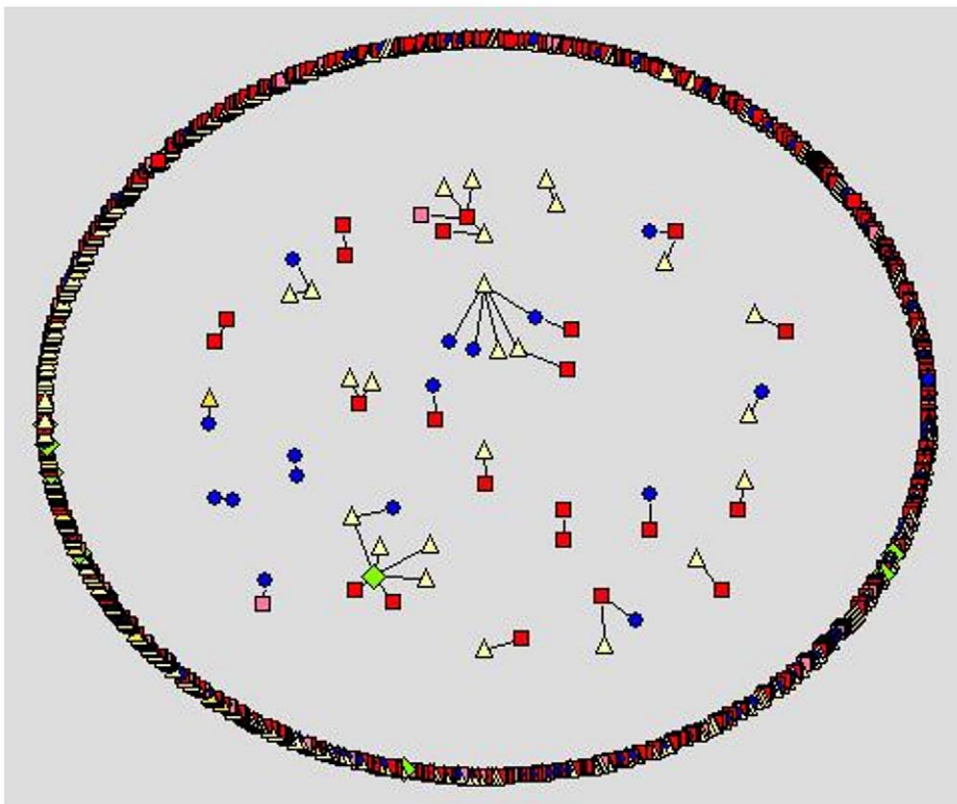

**Figure 4. Melanoma forum, intimate dyads.**  
doi:10.1371/journal.pone.0049169.g004

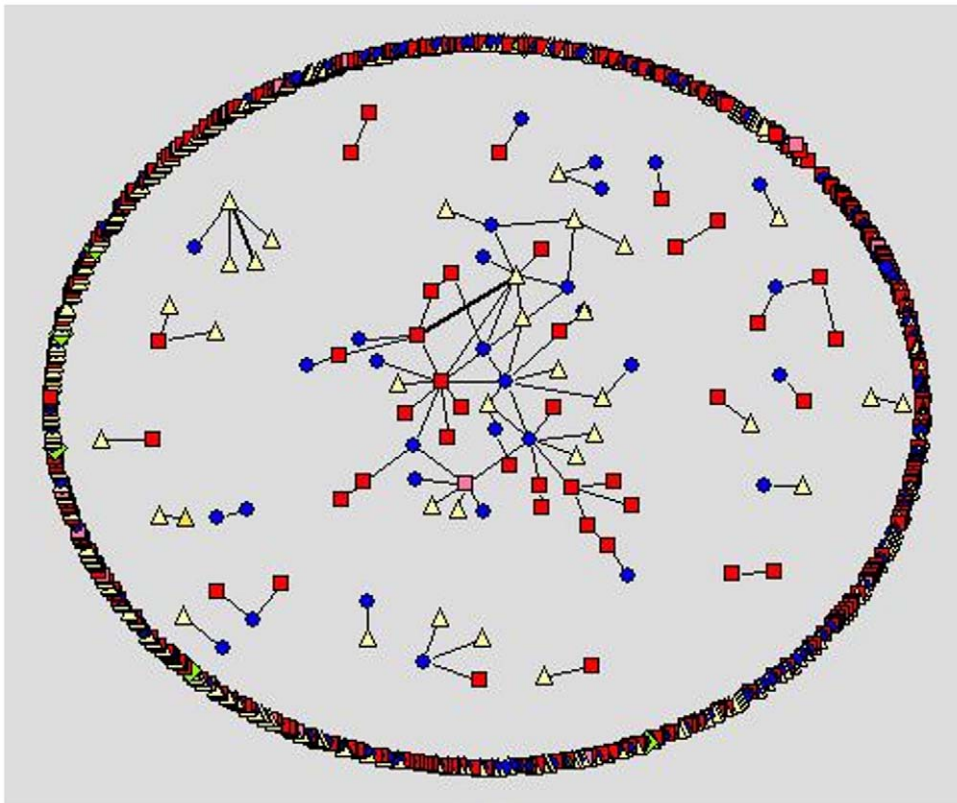

**Figure 5. Renal cell cancer forum, intimate dyads.**

doi:10.1371/journal.pone.0049169.g005

there is a specific gender associated with the majority of these caregivers. This fact is visually displayed by the balance of red and blue nodes within Figure 4 and Figure 5.

Within the ovarian cancer forum (Figure 3) we observe many, relatively thicker edges between patients/survivors, demonstrating the highly intimate relationships between these two female patients/survivors. Within the prostate cancer forum (Figure 2) there are few disconnected sub-networks. All nodes are directly or indirectly connected to one another. This displays the high level of interconnectedness among male patients in the prostate forum. Male patients prefer to discuss topics with many different people. This is very different from the breast cancer forum where there are many sub-networks of two to four people only connected to each other. There are a few sub-networks within the center of the network where some nodes are connected to more than four people but typically the network consists of many disconnected sub-networks (Figure 1).

## Discussion

The communicative behavior of a male cancer patient/survivor on a male-specific cancer forum is typically different from the communicative behavior of a female patient/survivor on a female-specific cancer forum. Patient/survivors within the prostate forum, in general, connect with more members than female patient/survivors do on the ovarian and breast cancer forums. This finding is visually displayed in Figure 2 and statistically shown in Table 3. This supports the belief that men prefer to socialize in large groups. Identified male patient/survivors communicating in online cancer forums are displaying aspects of the preferred face-to-face communication style of males. This social preference is practiced

in group therapy, which has been shown to work well with men [45–50].

The communicative behavior of a female patient/survivor within a female-specific cancer forum is different from the behavior of a male patient/survivor on a male-specific cancer forum. A female patient/survivor on a female-specific cancer forum (ovarian cancer or breast cancer) is more likely to form a highly intimate connection with another female patient/survivor. This finding is visually displayed in Figure 1 and Figure 3 and statistically shown in Table 4. A highly intimate connection means more communication between two specific female patient/survivors. Female patient/survivors are choosing to communicate more messages to a select group of other female patient/survivors. This supports the belief that females prefer to communicate heavily (number of messages) with fewer people (number of nodes) [12–14]. Identified female patient/survivors communicating in online cancer forums are displaying aspects of the preferred communication styles of females. This social preference should be modeled when defining Health 2.0 interventions for females; for example providing multimodal, omnipresent forms of communication (such as SMS, or Instant Messaging). Also providing private areas and/or times when two female patient/survivors may meet in person and discuss their illness alone should also be considered.

Women diagnosed with breast cancer or ovarian cancer are significantly more likely to register as a survivor at the cancercompass website than a cancer patient at the prostate cancer, melanoma or renal cell cancer forum. This finding is difficult to interpret since there are many different definitions of a cancer survivor [64]. One definition defines a person as a cancer survivor from diagnosis until the end of his/her life [64], [65]; whereas another definition limits survivors to any person



diagnosed with cancer in the past but has gone beyond his/her initial treatment and have no evidence of the disease [64]. If women are using the former definition then they are categorizing themselves as fighting the disease. However, if they are using the latter definition, then more women who have lived beyond cancer are choosing to join the online community to support women currently battling cancer. Given these varying definitions for the term survivor, we are not able to determine the significance of the percentage difference; however we can state that female cancer patients are accepting the identity of a cancer survivor.

The length of the relationship between two patient/survivors in the gender-specific forums is longer (in days) than the relationships between two members not identified as patient/survivors; however this is not found to be true for patient/survivors within a gender-neutral cancer forum. Patient/survivors with the same gender, suffering from the same cancer have longer relationships (measured in days) than relationships between two non-patients found on the same forum. Same-gender patient/survivors suffering from the same cancer once connected, communicate with each other for a longer period of time. This finding supports the belief that patient/survivors join online cancer forums to communicate with people who are or have experienced what they are experiencing; and are similar in ilk to them; the homophilic or birds-of-a-feather phenomenon [57]. However, since patient/survivors do not exhibit this behavior on gender-neutral forums, we believe gender plays a crucial role in online relationship creation and longevity. It may also play a role in online peer support among cancer patients.

Even though we have categorized the melanoma and renal cell forums as gender-neutral forums, they are statistically different from each other for communication measures. Our analysis shows that the renal cell forum measures are more similar to the prostate response measures than to the measures of the melanoma forum. A typical renal cell cancer patient/survivor communicates with the same number of forum members as the prostate cancer forum member. We believe this is due to the likelihood of more male forum members on the renal cell forum given the high incidence rate of renal cell carcinoma in males compared to females (Table 2). However, since we do not have gender specifications for these members we cannot verify this hypothesis.

For the relationship measures, the gender-neutral forum measures are different from the gender-specific forum measures. Male patient/survivors on a male-specific cancer forum and female patient/survivors on the female-specific cancer forums are more likely to have an intimate bond with another patient/survivor. This is not true for a patient/survivor on a gender-neutral cancer forum. A renal cell cancer patient/survivor is just as likely as any other forum member to form an intimate bond with another member. A melanoma patient/survivor's relationship measures are lower than a typical member's relationship measures, meaning two melanoma patient/survivors are less likely to be intimate on the melanoma forum. This finding may be because the different gender-preferred communication styles or different language styles [21–28] are preventing patient/survivors with different genders from bonding. It may also be due to the strong influence of the caregiver members as demonstrated in Figure 5. Melanoma patients may have a stronger support network than a typical cancer patient; such as an at-home caregiver willing to engage online with other people discussing their loved one's melanoma.

As found in this research as well as other studies, males and females typically have different communications preferences; these preferences can influence the results of a Health 2.0 communication interventions research study. For example, there are many

studies evaluating the use of SMS technology for adherence to treatment; adherence topics such as weight management [66–67], diabetes treatment [68–71], HIV treatment [72–73], breast cancer screenings [74], and sunscreen application [75–76]. It is important that these studies stratify the results by gender, to recognize the actual benefits of the study. Also it may be difficult to choose one optimal number of outreaches for both genders, since the two genders typically prefer diverse communication styles. An optimal number of outreaches for a female may be too many for a typical male.

### Limitations of the Study

Unfortunately the descriptive information we have associated with each member is limited to a user type. In particular, we do not have access to the gender information for each member. We can only deduce the gender for a subset of the patients given the cancer type diagnosis, for example members registering as a patient or a survivor on a male cancer forum is a man, and a member registering as a patient or a survivor on a female cancer forum is a woman. If we had access to each member's gender, we could differentiate between the varying homophilic tendencies of same gender and same cancer diagnosis among patients. We also do not have access to a participant's age, state of residence, educational level, socio-economic, medical history, technical capacities or other describing features that may influence a person's participation in an online health community. These factors may affect the outcome measures.

Our study assumes the number of communication interactions represent the level of intimacy between two members. Even though this representation has been used in prior studies, it has not been validated as a proxy for intimacy. For example, the content of a message such as the topics discussed could provide a more accurate representation of intimacy.

Our study is limited to one online website ([www.cancercompass.com](http://www.cancercompass.com)) and six online communities within this web site (breast cancer forum, ovarian cancer forum, prostate cancer forum, testicular cancer forum, renal cell cancer forum and melanoma forum); the website may not be representative of other websites that host online cancer communities. The male-specific online communities within this study may not be representative of typical interactions found at other male-specific online health communities. The female-specific online communities within this study may not be representative of typical interactions found at other female-specific online health communities.

For statistical analysis, we grouped patients and survivors into one group since we wanted to investigate communication patterns between people who have had a cancer diagnosis vs. people who support people with a cancer diagnosis. However people considering themselves a survivor may behave differently than people who consider themselves a patient.

### Conclusion

We have identified male-preferred social styles being conducted by male patient/survivors in a male-specific cancer forum and female-preferred social styles being conducted by female patient/survivors. Males prefer a high level of interconnectedness; this supports the belief that men prefer to socialize in large, interconnected groups. Females are more likely to form a highly intimate connection with another female and the sub-network consisting of females within the female-specific forums provide a lower level of interconnectedness than the prostate forum. These findings support the belief that women prefer fewer, more intimate connections within their social group. Identifying and understanding patients' communicative profiles will help quantify the

informational and relational support desired by female and male cancer patients. These findings can be useful when designing educational and psychosocial interventions for cancer patients. Lastly, monitoring the behavior of male and female cancer patients within online cancer forums can provide insight into the different psychosocial support needed by male cancer patients and female cancer patients.

## References

- Benenson JF, Antonellis TJ, Cotton BJ, Noddin KE, Campbell KA (2008) Sex differences in children formation of exclusionary alliances under scarce resource condition. *Animal Behavior* 76: 497–505. doi:10.1016/j.anbehav.2008.01.027.
- Martin CL, Fabes RA (2001) The stability and consequences of young children's same-sex peer interactions. *Developmental Psychology* 37: 3: 431–466.
- Maccoby EE (1988) Gender as a social category. *Development Psychology* 24: 755–765.
- Maccoby EE (1990) Gender and relationships: A developmental account. *American Psychologist* 45: 513–520.
- Maccoby EE (1994) San Francisco Commentary: Gender Segregation in childhood. In Leaper C editors. *Childhood gender segregation: causes and consequences*, Jossey-Bass. 87–98.
- Maccoby EE (1998) *The two sexes: growing up apart, coming together*. Cambridge, MA: Belknap Press of Harvard University.
- Maccoby EE, Jacklin CN (1987) *Gender segregation in childhood*. Advances in child development and behavior Volume 20 New York; Academic Press: 239–288.
- Markovits H, Benenson JF, Dolensky E (2000) Evidence that children and adolescents have internal models of peer interactions that are gender differentiated. *Child development* 72; 879–886.
- Benenson JF (1990) Gender differences in social networks. *Journal of Early Adolescence* 10: 472–495.
- Benenson JF (1993) Greater preference among females than males for dyadic interaction in early childhood. *Child Development* 64: 544–555.
- Benenson JF, Apostoleris NH, Parnass J (1997) Age and sex differences in dyadic and group interaction. *Developmental Psychology* 33: 538–543.
- Virgil JM (2007) Asymmetries in the friendship preferences and social styles of men and women. *Hum Nat* 18: 143–161.
- Buhrmester D, Prager K (1995) *New York Patterns of functions of self-disclosure during childhood and adolescence*. In Rotenberg KJ editor *Disclosure processes in children and adolescents* Cambridge University Press. 10–56.
- Oswald DL, Clark EM, Kelly CM (2004) Friendship Maintenance: An analysis of individual and dyad Behaviors. *Journal of Social and Clinical Psychology* 23(3): 413–441.
- Benenson JF, Christakos A (2003) The Greater Fragility of Females' Versus Males' Closest Same-Sex Friendships. *Child Development* 74: 1123–1129. doi: 10.1111/1467-8624.00596.
- Benenson JF, Markovits H, Fitzgerald C, Geoffroy D, Flemming J, et al. (2009) Males' Greater tolerance of same-sex peers. *Psychological Science* 20(2): 184–190.
- Baumeister RF, Sommer KL (1997) What do men want? Gender differences and two spheres of belongingness comment by Cross and Madson. *Psychological Bulletin* 122(1): 38–44.
- Wood JJ, Inman CC (1993) In a different mode: masculine styles of communicating closeness. *J Appl. Commun. Res.* 21: 279–295.
- Lakoff RT, Scherr R (1975) *Language and woman's place*. New York: Harper & Row.
- Edelsky C (1981) Who's got the floor? *Language in Society*, 10, 383–421.
- Paolillo JC (2001). Language variation on Internet Relay Chat: A social network approach. *Journal of Sociolinguistics*, 5: 180–213. doi: 10.1111/1467-9481.00147.
- Herring SC (1992) Gender and participation in computer-mediated linguistic discourse. Washington, D.C.: ERIC Clearinghouse on Languages and Linguistics. Document no. ED345552. Available: <http://ella.slis.indiana.edu/herring/participation.1992.pdf>. Accessed 2012 Sept 1.
- Herring SC (2003) Gender and power in online communication. In J. Holmes & M. Meyerhoff (Eds.), *The handbook of language and gender* (pp. 202–228). Oxford, UK: Blackwell Publishers.
- Mo PKH, Malik AH, Coulson NS (2009) Gender Differences in computer-mediated communication: A systematic literature review of online health-related support groups. *Patient Education and Counseling* 75: 16–24.
- Savicki V, Kelley M (2000) Computer mediated communication: gender and group composition. *Cyber Psychol Behav* 3: 817–825.
- Blank TO, Adams-Blodnieks M (2007) The who and the what of usage of two cancer online communities. *Comput Hum Behav* 23: 1249–57.
- Klemm P, Hurst M, Dearholt SL, Trone SR (2007) Cyber solace: gender differences on Internet cancer support groups. *Comput Nurs* 17: 65–72.
- Sullivan CF (2003) Gendered cybersupport: a thematic analysis of two online cancer support groups. *J Health Psychol* 8: 83–103.
- Owen JE, Klapow JC, Roth DL, Tucker DC (2007) Use of the Internet for information and support: disclosure among persons with breast and prostate cancer. *Journal of behavioral medicine* 27(5): 491–505.
- Owen JE, Goldstein MS, Lee JH, Breen N, Rowland JH (2004) Use of health-related and cancer-specific support groups among adult cancer survivors. *Cancer* 109(12): 2580–2589.
- Lieberman MA (2008) Gender and online cancer support groups: issues facing male cancer patients. *Journal of cancer education* 23: 167–171.
- Guo L, Tan E, Chen S, Zhang X, Zhao Y (2008) Analyzing patterns of user content generation in online social networks. Proceedings of the 15th ACM SIGKDD International conference on knowledge discovery and data mining 369–378.
- Goodwin PJ, Leszcz M, Ennis M, Koopmans J, Vincent L, et al. (2001) The effect of group psychosocial support on survival in metastatic breast cancer. *N Eng J Med* 345: 1719–1726.
- Norton TR, Manne SL, Rubin S, Hernandez JE, Edelson MI, et al. (2004) Prevalence and predictors of psychological distress among women with ovarian cancer. *J Clin Oncol* 22(5): 919: 26.
- Lieberman M, Golant M, Giese-Davis J, Winzenberg A, Benjamin H, et al. (2003) Electronic support groups for breast carcinoma: a clinical trial of effectiveness. *Cancer* 97(4): 920–925.
- Winzelberg AJ, Classen C, Alpers GW, Roberts H, Koopman C, et al. (2003) Evaluation of an internet support group for women with breast cancer. *Cancer* 98(5): 1164–1173.
- Friedman HS, Silver RC Eds. (2007) *Foundations of Health Psychology*. New York: Oxford University Press.
- Eysenbach G, Till JE (2001) Ethical issues in qualitative research on Internet communities. *BMJ* 323: 1103–1105.
- Kiss A, Meryn A (2001) Effect of sex and gender on psychosocial aspects of prostate and breast cancer. *BMJ* 323: 1055–1058.
- Meric F, Bernstam EV, Mirza NQ, Hunt KK, Ames FC, et al. (2002) Breast cancer on the world wide web: cross-sectional survey of quality of information and popularity of websites. *BMJ* 324(7337): 577–581.
- Lieberman MA, Golant M, Winzenberg A, Mctavish F, Gustafon DH (2004) Comparisons: professionally-directed and self-directed internet groups for women with breast cancer. *Int J Self Help*. 2(3): 219–235.
- Vigil JM (2008) Gender and online cancer support groups: Issues facing male cancer patients. *Journal of Cancer Education* 23(3): 167–171.
- Grossar T (2008) Online participation: a content analysis of differences in utilization of two online cancer communities by men and women patients and family members. *Health Commun* 23(1): 1–12.
- Andronico MP (ed.) (1997) *Men in groups: Insights, Interventions, Psychoeducational work*. Washington DC: American Psychological Association press, 410 pp.
- Calamari JE, Cox WM, Roth JD (1997) *Group Treatments for Men with Alcohol Problems*. In Andronico MP (ed.) *Men in groups: Insights, Interventions, Psychoeducational work* Washington DC: American Psychological association. 305–21.
- Catherall DR, Shelton RB (1997) *Men's Groups for Posttraumatic Stress Disorder and the Role of Shame*. In Andronico MP (ed.) *Men in groups: Insights, Interventions, Psychoeducational work*. Washington DC: American Psychological association press.
- Harrison JB, Morris LA (1997) *Group Therapy for Adult Male Survivors of Child Sexual Abuse*. In Andronico MP. (ed.) *Men in groups: Insights, Interventions, Psychoeducational work*. Washington DC: American Psychological association press.
- Harway M, Evans K (1997) *Working in Groups With Men Who Batter*. In Andronico MP. (ed.) *Men in groups: Insights, Interventions, Psychoeducational work*. Washington DC: American Psychological association press.
- Becket JV (1997) *Outpatient Treatment of Adolescent Male Sexual Offenders*. In Andronico MP. (ed.) *Men in groups: Insights, Interventions, Psychoeducational work*. Washington DC: American Psychological association press.
- Lazur RF (1997) *Managing Boundaries: Group Therapy With Incarcerated Adult Male Sexual Offenders*. In Andronico MP (ed.) *Men in groups: Insights, Interventions, Psychoeducational work*. Washington DC: American Psychological association press.
- Pew Internet & American Life Project Website. Fox, S. (2011) *The Social Life of Health Information, 2011*. Pew Internet and American Life Project. Available: <http://pewinternet.org/Reports/2011/Social-Life-of-Health-Info.aspx>. Accessed 2012 Oct.

## Author Contributions

Conceived and designed the experiments: KTD ATM CS. Performed the experiments: KTD. Analyzed the data: KTD. Contributed reagents/materials/analysis tools: KTD. Wrote the paper: KTD. Reviewed and commented on previous revisions of the document: ATM, CS.

52. Baum A, Andersen BL (eds.) (2001) *Psychosocial Interventions for Cancer*. Washington DC: American Psychological Association.
53. Mead S, MacNeil C (2006). Peer support: What makes it unique? *International Journal of Psychosocial Rehabilitation*, 10 (2), 29–37.
54. Solomon PS (2004) Peer support/peer provided services: Underlying processes, benefits, and critical ingredients. *Psychiatric Rehabilitation Journal*, 27(4): 392–401.
55. Davidson L, Chinman M, Kloos B, Weingarten R, Stayner D, et al. (1999). Peer support among individuals with severe mental illness: A review of the evidence. *Clinical Psychology: Science and practice*, 6, 165–187.
56. The Surveillance Epidemiology and End Results Website provided by the National Cancer Institute. Altekruze SF, Kosary CL, Krapcho M, Neyman N, Aminou R, et al. (eds). (2007) *SEER Cancer Statistics Review, 1975–2007*, National Cancer Institute. Bethesda, MD, [http://seer.cancer.gov/csr/1975\\_2007/](http://seer.cancer.gov/csr/1975_2007/), based on November 2009 SEER data submission, posted to the SEER web site, 2010. Available: <http://seer.cancer.gov/statfacts/html/breast.html>, <http://seer.cancer.gov/statfacts/html/ovary.html>, <http://seer.cancer.gov/statfacts/html/melan.html>, <http://seer.cancer.gov/statfacts/html/testis.html>, <http://seer.cancer.gov/statfacts/html/prost.html>, <http://seer.cancer.gov/statfacts/html/kidrp.html>. Accessed 2012 Oct.
57. Hutson TE (2005) Renal Cell Carcinoma: diagnosis and treatment 1994–2003. In the proceedings of Baylor University Medical Center. October; 18(4): 337–340.
58. Jemal A, Murray T, Ward E, Samuels A, Tiwari RC, et al. (2005) Cancer statistics CA Cancer J Clin. 55: 10–30.
59. Nooy W, Mrvar A, Batagelj V (2005) *Exploratory Social Network Analysis with Pajek*. New York: Cambridge Press 334 p.
60. Hansen DL, Shneiderman B, Smith MA (2011) *Analyzing social media networks with NodeXL: Insights from a connected world*. Burlington MA: Morgan Kaufman Publishing 284 p.
61. Kamada T, Kawai S (1988) An algorithm for drawing general undirected graphs. *Information Processing Letters* 1988: 31:7–15.
62. Wilson C, Boc B, Sala A, Puttaswamy PN, Zhao BY (2009) User interactions in social networks and their implications. In proceedings from ACM EuroSys.
63. Durant KT, McCray AT, Safran C (2010) Social network analysis of an online melanoma discussion group. Proceedings of the 2010 AMIA Clinical Research Informatics Summit, Omnipress, 2010 March: 6–10.
64. Twombly R. (2004) What's in a Name: Who is a cancer survivor. *JNCI J Natl Cancer Inst*. 96 (19): 1414–1415. doi: 10.1093/jnci/96.19.1414.
65. National Cancer Institute website. Available: <http://dcgps.nci.nih.gov/ocs/definitions.html> Accessed 2012 Sept.
66. Woolford SJ, Clark SJ, Strecher VJ, Resnicow K (2010) Tailored mobile phone text messages as an adjunct to obesity treatment for adolescents. *J Telemed Telecare* 16(8): 458–61.
67. Bauer S, de Niet J, Timman R, Kordy H (2010) Enhancement of care through self-monitoring and tailored feedback via text messaging and their use in the treatment of childhood overweight. *Patient Educ Couns*. 79(3): 315–9.
68. Ferrer-Roca O, Cárdenas A, Diaz-Cardama A, Pulido P (2004) Mobile phone text messaging in the management of diabetes. *J Telemed Telecare* 10(5): 282–5.
69. Hanauer DA, Wentzell K, Laffel N, Leffel LM (2009) Computerized automated reminder diabetes system (CARDS): email and SMS cell phone text messaging reminders to support diabetes management. *Diabetes Technol Ther*. 11(2): 99–106.
70. Hussein WI, Hasan K, Jaradat AA (2011) Effectiveness of mobile phone short message service on diabetes mellitus management: the SMS-DM study. *Diabetes Res Clin Pract*. 94(1): 24–6.
71. Wangberg SC, Arsand E, Andersson N (2006) Diabetes education via mobile text messaging. *J Telemed Telecare* 12 1: 55–6.
72. Mbuagbaw L, Thabane L, Ongolo-Zogo P, Lester RT, Mills E (2011) The Cameroon mobile phone SMS (CAMPSS) trial: a protocol for a randomized control trial of mobile phone text messaging versus usual care for improving adherence to highly active anti-retroviral therapy. *Trials* Jan 7: 5–12.
73. Coomes CM, Lewis MA, Uhrig JD, Furberg RD, Harris JL, et al. (2012) Beyond reminders: a conceptual framework for using short message service to promote prevention and improve healthcare quality and clinical outcomes for people living with HIV. *AIDS care*. 24(3): 348–57.
74. Lakkis NA, El-Zein YR, Mahmassani DM, Hamadeh GN (2011) The effect of two types of sms-texts on the uptake of screening mammogram: a randomized controlled trial. *Prev Med* 53(4–5):325–7.
75. Armstrong AW, Watson AJ, Makredes M, Frangos JE, Kimball AB et al. (2009) Text-messaging reminders to improve sunscreen use: a randomized controlled trial using electronic monitoring. *Arch Dermatol*. 145(11): 1230–6.
76. Fjeldsoe BS, Marshall AL, Miller YD (2009) Behavior change interventions delivered by mobile telephone short-message service *Am J Prev Med* 36(2): 165–173.
